# Supplementary material for: A series of porous 3D inorganic–organic hybrid framework crystalline materials based on 5-aminoisophthalic acid for photocatalytic degradation of crystal violet
Source: Royal Society of Chemistry journal article supplement (doi:10.1039/d0nj05472k), 2021-01-01
Supplement: d0nj05472k1.pdf [file d0nj05472k1.pdf]

## Supporting information

# A series of porous 3D inorganic organic hybrid framework crystalline materials based on 5-Aminoisophthalic Acid for photocatalytic degradation of Crystal Violet

Yu Xin<sup>a</sup>, Jun Zhou<sup>a</sup>, Yong Heng Xing<sup>a</sup>, Feng Ying Bai<sup>a\*</sup>, Li Xian Sun<sup>b\*</sup>

<sup>a</sup>College of Chemistry and Chemical Engineering, Liaoning Normal University, Huanghe Road 850#, Dalian 116029, P. R. China

<sup>b</sup>Guangxi Key Laboratory of Information Materials, Guilin University of Electronic Technology, Guilin 541004, P. R. China

Table S1 Crystallographic data for complexes 1-3\*

| Complexes                                           | 1                                                                | 2                                                               | 3                                                                                                   |
|-----------------------------------------------------|------------------------------------------------------------------|-----------------------------------------------------------------|-----------------------------------------------------------------------------------------------------|
| Formula                                             | C <sub>13</sub> H <sub>13</sub> N <sub>2</sub> O <sub>6</sub> Zn | C <sub>13</sub> H <sub>9</sub> N <sub>2</sub> O <sub>4</sub> Cu | C <sub>13</sub> H <sub>13</sub> N <sub>2</sub> O <sub>6</sub> Ni <sub>0.25</sub> Zn <sub>0.75</sub> |
| <i>M</i> (g·mol <sup>-1</sup> )                     | 358.62                                                           | 320.76                                                          | 351.96                                                                                              |
| Crystal system                                      | <i>Monoclinic</i>                                                | <i>Monoclinic</i>                                               | <i>Monoclinic</i>                                                                                   |
| Space group                                         | <i>P2<sub>1</sub>/c</i>                                          | <i>P2<sub>1</sub>/c</i>                                         | <i>P2<sub>1</sub>/c</i>                                                                             |
| <i>a</i> (Å)                                        | 12.3235(9)                                                       | 12.5486(14)                                                     | 12.4092(9)                                                                                          |
| <i>b</i> (Å)                                        | 7.6722(5)                                                        | 7.6374(9)                                                       | 7.6700(5)                                                                                           |
| <i>c</i> (Å)                                        | 16.1144(12)                                                      | 16.0778(18)                                                     | 16.0912(12)                                                                                         |
| <i>α</i> (°)                                        | 90                                                               | 90                                                              | 90                                                                                                  |
| <i>β</i> (°)                                        | 108.5810(10)                                                     | 109.037(2)                                                      | 108.6420(10)                                                                                        |
| <i>γ</i> (°)                                        | 90                                                               | 90                                                              | 90                                                                                                  |
| <i>V</i> (Å <sup>3</sup> )                          | 1444.17(18)                                                      | 1456.6(3)                                                       | 1451.18(18)                                                                                         |
| <i>Z</i>                                            | 4                                                                | 4                                                               | 4                                                                                                   |
| <i>D<sub>c</sub></i> (g·cm <sup>-3</sup> )          | 1.649                                                            | 1.463                                                           | 1.611                                                                                               |
| <i>F</i> (000)                                      | 732                                                              | 648                                                             | 724                                                                                                 |
| <i>M</i> (Mo-Kα) (mm <sup>-1</sup> )                | 1.732                                                            | 1.512                                                           | 1.368                                                                                               |
| <i>θ</i> (°)                                        | 1.743-29.599                                                     | 1.717-24.999                                                    | 1.732-24.994                                                                                        |
| Reflections collected                               | 3642                                                             | 3955                                                            | 4864                                                                                                |
| Independent reflections ( <i>I</i> >2σ( <i>I</i> )) | 3882                                                             | 2557                                                            | 2547                                                                                                |
| Parameters                                          | 200                                                              | 181                                                             | 200                                                                                                 |
| Δ(ρ) (e Å <sup>-3</sup> )                           | 1.322 and -0.874                                                 | 0.320 and -0.268                                                | 2.146 and -0.717                                                                                    |
| Goodness of fit                                     | 1.114                                                            | 1.158                                                           | 1.106                                                                                               |
| <i>R<sup>a</sup></i>                                | 0.0690(0.0532) <sup>b</sup>                                      | 0.0418(0.0373) <sup>b</sup>                                     | 0.0611(0.0583) <sup>b</sup>                                                                         |
| <i>wR<sub>2</sub><sup>a</sup></i>                   | 0.1731(0.1856) <sup>b</sup>                                      | 0.0831(0.0843) <sup>b</sup>                                     | 0.1695(0.1713) <sup>b</sup>                                                                         |

\*<sup>a</sup>*R* =  $\sum |F_o - F_c| / \sum |F_o|$ , *wR*<sub>2</sub> =  $\{\sum [w(F_o^2 - F_c^2)^2] / \sum [w(F_o^2)^2]\}^{1/2}$ ; [*F*<sub>o</sub> > 4σ(*F*<sub>o</sub>)]. <sup>b</sup>Based on all data.

Table S2 Crystallographic data for complexes 4-7\*

| Complexes                                                   | 4                                                                | 5                                                                | 6                                                                | 7                                                                 |
|-------------------------------------------------------------|------------------------------------------------------------------|------------------------------------------------------------------|------------------------------------------------------------------|-------------------------------------------------------------------|
| Formula                                                     | C <sub>13</sub> H <sub>13</sub> N <sub>2</sub> O <sub>6</sub> Cr | C <sub>13</sub> H <sub>13</sub> N <sub>2</sub> O <sub>6</sub> Co | C <sub>13</sub> H <sub>13</sub> N <sub>2</sub> O <sub>6</sub> Fe | C <sub>16</sub> H <sub>16</sub> N <sub>2</sub> O <sub>10</sub> Mn |
| <i>M</i> (g·mol <sup>-1</sup> )                             | 345.25                                                           | 354.20                                                           | 349.10                                                           | 451.25                                                            |
| Crystal system                                              | <i>Monoclinic</i>                                                | <i>Monoclinic</i>                                                | <i>Monoclinic</i>                                                | <i>Monoclinic</i>                                                 |
| Space group                                                 | <i>P2<sub>1</sub>/c</i>                                          | <i>P2<sub>1</sub>/c</i>                                          | <i>P2<sub>1</sub>/c</i>                                          | <i>P2/n</i>                                                       |
| <i>a</i> (Å)                                                | 12.5435(9)                                                       | 12.6083(16)                                                      | 12.228(3)                                                        | 7.040(4)                                                          |
| <i>b</i> (Å)                                                | 7.6671(6)                                                        | 7.6426(9)                                                        | 7.6950(16)                                                       | 10.055(6)                                                         |
| <i>c</i> (Å)                                                | 16.1534(11)                                                      | 16.1273(19)                                                      | 16.114(4)                                                        | 11.499(7)                                                         |
| $\alpha$ (°)                                                | 90                                                               | 90                                                               | 90                                                               | 90                                                                |
| $\beta$ (°)                                                 | 108.7710(10)                                                     | 109.076(2)                                                       | 108.418(4)                                                       | 95.072(10)                                                        |
| $\gamma$ (°)                                                | 90                                                               | 90                                                               | 90                                                               | 90                                                                |
| <i>V</i> (Å <sup>3</sup> )                                  | 1470.88(19)                                                      | 1468.7(3)                                                        | 1438.5(5)                                                        | 810.8(8)                                                          |
| <i>Z</i>                                                    | 4                                                                | 4                                                                | 4                                                                | 2                                                                 |
| <i>D<sub>c</sub></i> (g·cm <sup>-3</sup> )                  | 1.559                                                            | 1.602                                                            | 1.612                                                            | 1.848                                                             |
| <i>F</i> (000)                                              | 708                                                              | 728                                                              | 716                                                              | 462                                                               |
| <i>M</i> (Mo K $\alpha$ ) (mm <sup>-1</sup> )               | 0.808                                                            | 1.199                                                            | 1.199                                                            | 0.883                                                             |
| $\theta$ (°)                                                | 1.715-28.105                                                     | 1.709-24.993                                                     | 1.755-28.223                                                     | 2.025-25.242                                                      |
| Reflections collected                                       | 3585                                                             | 4337                                                             | 1135                                                             | 945                                                               |
| Independent reflections( <i>I</i> >2 $\sigma$ ( <i>I</i> )) | 3504                                                             | 2555                                                             | 3487                                                             | 2008                                                              |
| Parameters                                                  | 200                                                              | 197                                                              | 200                                                              | 124                                                               |
| $\Delta(\rho)$ (e Å <sup>-3</sup> )                         | 1.817 and -1.360                                                 | 3.047 and -1.506                                                 | 1.177 and --0.498                                                | 1.021 and -0.694                                                  |
| Goodness of fit                                             | 1.079                                                            | 1.061                                                            | 1.022                                                            | 1.044                                                             |
| <i>R</i> <sup>a</sup>                                       | 0.0966(0.0835) <sup>b</sup>                                      | 0.0901(0.0844) <sup>b</sup>                                      | 0.1601(0.0730) <sup>b</sup>                                      | 0.0966(0.0537) <sup>b</sup>                                       |
| <i>wR</i> <sub>2</sub> <sup>a</sup>                         | 0.2395(0.2525) <sup>b</sup>                                      | 0.2520(0.2571) <sup>b</sup>                                      | 0.2046(0.2562) <sup>b</sup>                                      | 0.1209(0.1394) <sup>b</sup>                                       |

<sup>a</sup>*R* =  $\sum |F_o - F_c| / \sum |F_o|$ , *wR*<sub>2</sub> =  $\{\sum [w(F_o^2 - F_c^2)^2] / \sum [w(F_o^2)^2]\}^{1/2}$ ; [*F*<sub>o</sub>>4 $\sigma$ (*F*<sub>o</sub>)]. <sup>b</sup>Based on all data.

Table S3 The selected bond distances (Å) of complexes 1-7\*

| Complex 1                |          |                          |          |
|--------------------------|----------|--------------------------|----------|
| Zn(1)-N(2)               | 2.124(3) | Zn(1)-N(1)               | 2.043(3) |
| Zn(1)-O(4) <sup>#1</sup> | 1.980(3) | Zn(1)-O(2) <sup>#2</sup> | 1.937(3) |
| Complex 2                |          |                          |          |
| Cu(1)-N(1)               | 2.114(3) | Cu(1)-N(1AA)             | 2.036(3) |
| Cu(1)-O(3) <sup>#1</sup> | 1.977(2) | Cu(1)-O(2) <sup>#2</sup> | 1.954(2) |
| Complex 3                |          |                          |          |
| Ni(1)-N(1)               | 2.101(4) | Ni(1)-N(1)               | 2.044(4) |
| Ni(1)-O(2) <sup>#1</sup> | 1.985(3) | Ni(1)-O(3) <sup>#2</sup> | 1.937(3) |
| Complex 4                |          |                          |          |

|                          |          |                          |          |
|--------------------------|----------|--------------------------|----------|
| Cr(1)-N(1)               | 2.148(5) | Cr(1)-N(1)               | 2.049(4) |
| Cr(1)-O(3) <sup>#1</sup> | 1.946(4) | Cr(1)-O(1) <sup>#2</sup> | 1.986(4) |
| Complex 5                |          |                          |          |
| Co(1)-N(1)               | 2.113(5) | Co(1)-N(2)               | 2.041(5) |
| Co(1)-O(1) <sup>#1</sup> | 1.984(4) | Co(1)-O(3) <sup>#2</sup> | 1.942(5) |
| Complex 6                |          |                          |          |
| Fe(1)-N(1)               | 2.126(7) | Fe(1)-N(2)               | 2.038(6) |
| Fe(1)-O(1) <sup>#1</sup> | 1.978(5) | Fe(1)-O(3) <sup>#2</sup> | 1.939(5) |
| Complex 7                |          |                          |          |
| Mn(1)-O(4) <sup>#1</sup> | 2.149(3) | Mn(1)-O(4) <sup>#2</sup> | 2.149(3) |
| Mn(1)-O(1)               | 2.129(3) | Mn(1)-O(1) <sup>#3</sup> | 2.129(3) |
| Mn(1)-O(5) <sup>#3</sup> | 2.269(3) | Mn(1)-O(5)               | 2.269(3) |

\*Symmetry codes: Complex 1: #1, +x, -1+y, +z; #2, +x, 3/2-y, 1/2+z; Complex 2: #1, +x, 1+y, +z; #2, +x, 1/2-y, -1/2+z; Complex 3: #1, +x, -1+y, +z; #2, +x, 3/2-y, 1/2+z; Complex 4: #1, +x, 3/2-y, 1/2+z; #2, +x, 1+y, +z; Complex 5: #1, +x, -1+y, +z; #2, +x, 3/2-y, 1/2+z; Complex 6: #1, +x, 1+y, +z; #2, 2+x, 3/2-y, 1/2+z; Complex 7: #1, 3/2-x, -1+y, 1/2-z; #2, +x, -1+y, +z; #3, 3/2-x, +y, 1/2-z.

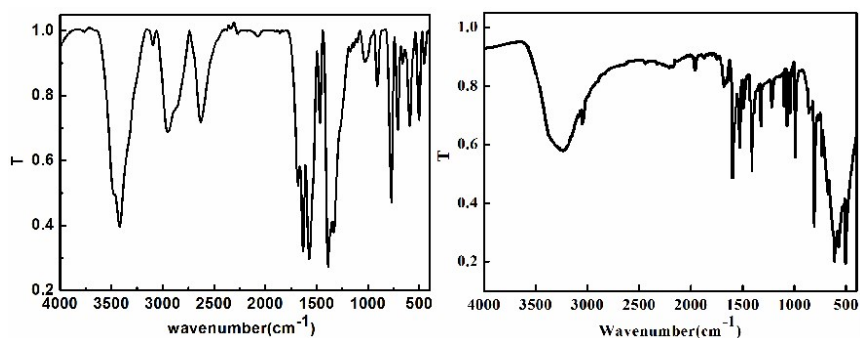

(a)

(b)

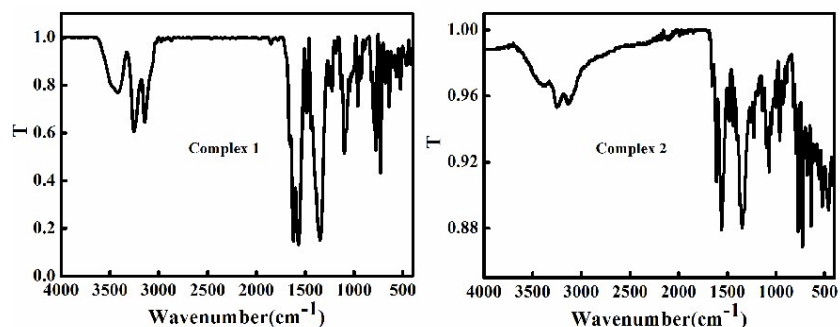

(c)

(d)

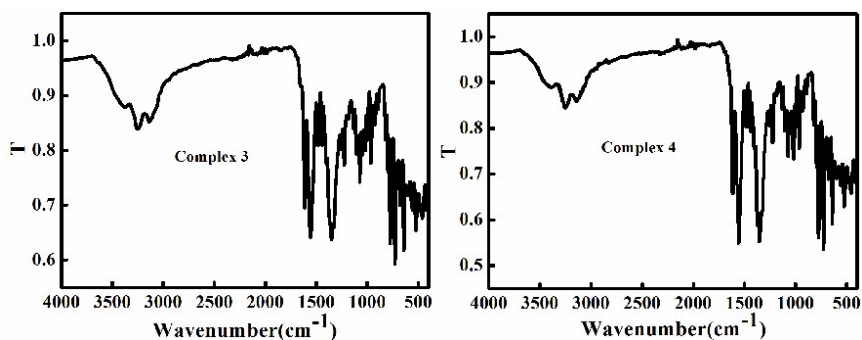

(e)

(f)

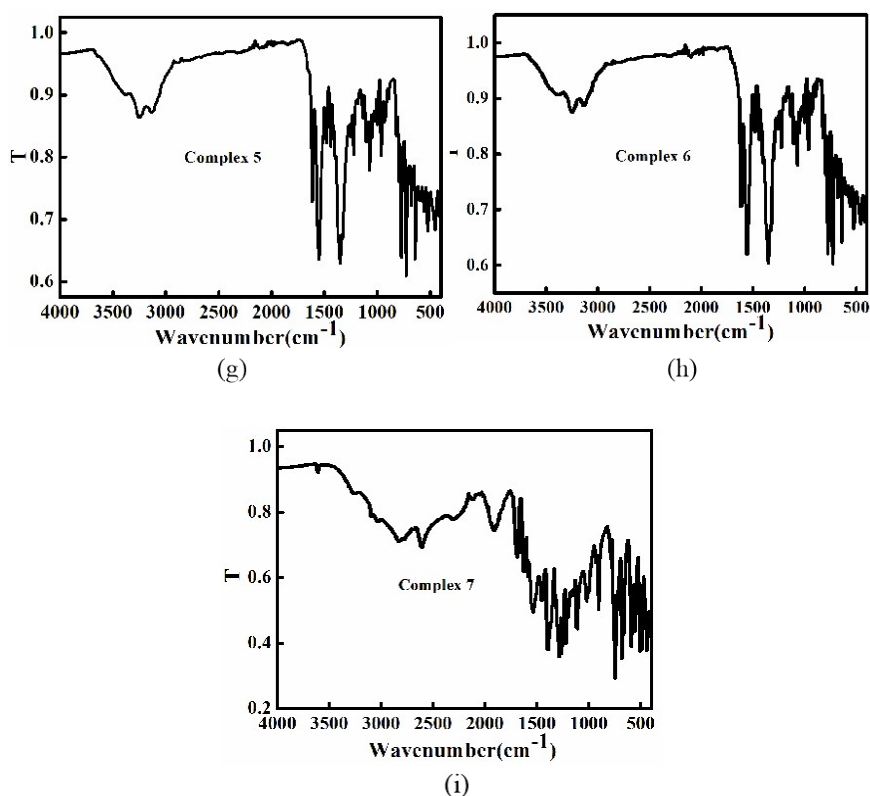

Figure S1 IR spectra of ligands and complexes 1-7: (a) Ligand 5-aip; (b) Ligand 4,4'-bipy; (c) Complex 1; (d) Complex 2; (e) Complex 3; (f) Complex 4; (g) Complex 5; (h) Complex 6; (i) Complex 7

Table S4 IR spectra (cm<sup>-1</sup>) of ligands 5-aip, 4,4'-bipy and complexes 1-7

|                        | 5-aip      | 4,4'-bipy  | 1          | 2          | 3          | 4          | 5          | 6          | 7          |
|------------------------|------------|------------|------------|------------|------------|------------|------------|------------|------------|
| $\nu_{\text{O-H}}$     | 3442       | 3242       | 3418       | 3382       | 3376       | 3394       | 3400       | 3394       | 3423       |
| $\nu_{\text{N-H}}$     | 3107       | -          | 3254       | 3248       | 3248       | 3254       | 3260       | 3260       | 3259       |
| $\nu_{\text{Ar-H}}$    | 3099       | 3053       | 3144       | 3126       | 3126       | 3132       | 3138       | 3138       | 3080       |
| $\nu_{\text{asCOO}^-}$ | 1691       | -          | 1558       | 1552       | 1558       | 1558       | 1564       | 1552       | 1561       |
| $\nu_{\text{sCOO}^-}$  | 1395       | -          | 1357       | 1351       | 1351       | 1351       | 1357       | 1345       | 1371       |
| $\nu_{\text{C=N}}$     | -          | 1679       | 1667       | 1667       | 1673       | 1671       | 1667       | 1661       | -          |
| $\nu_{\text{C=C}}$     | 1634, 1469 | 1600, 1418 | 1613, 1473 | 1619, 1442 | 1613, 1479 | 1613, 1430 | 1625, 1425 | 1619, 1485 | 1641, 1458 |
| $\nu_{\text{C-C}}$     | 1145       | 1102       | 1187       | 1144       | 1193       | 1175       | 1181       | 1181       | 1176       |
| $\nu_{\text{C-N}}$     | 1105       | 1077       | 1103       | 1102       | 1102       | 1108       | 1114       | 1108       | 1053       |
| $\nu_{\text{C-O}}$     | 1035       | -          | 1022       | 1071       | 1065       | 1077       | 1071       | 1041       | 1022       |
| $\delta_{\text{Ar-H}}$ | 778        | 797        | 773        | 773        | 767        | 779        | 778        | 779        | 781        |

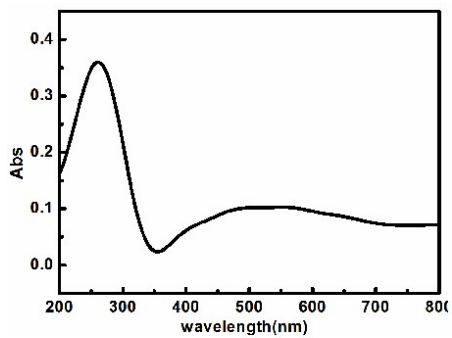

(a)

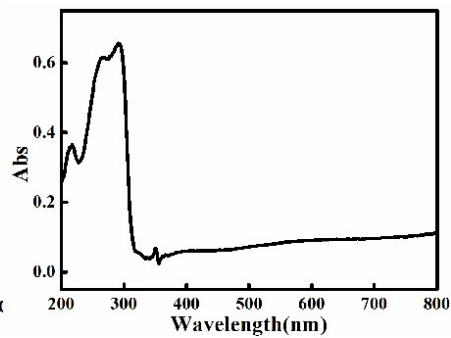

(b)

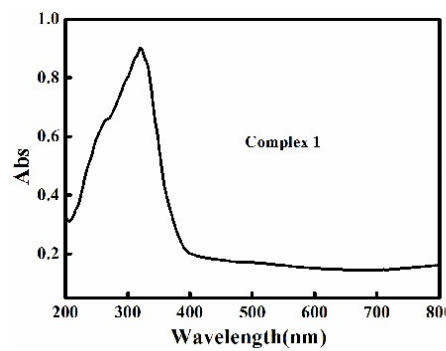

(c)

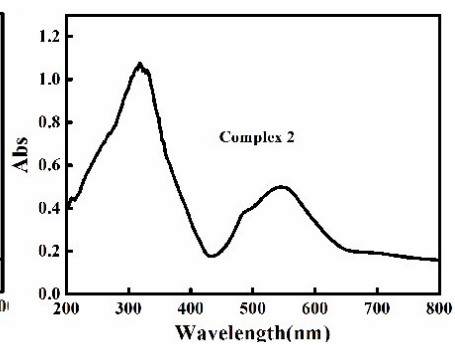

(d)

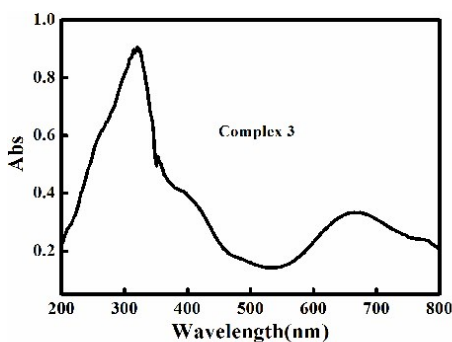

(e)

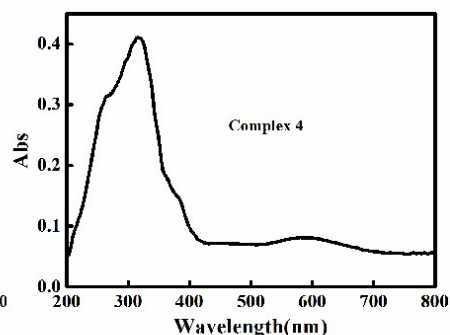

(f)

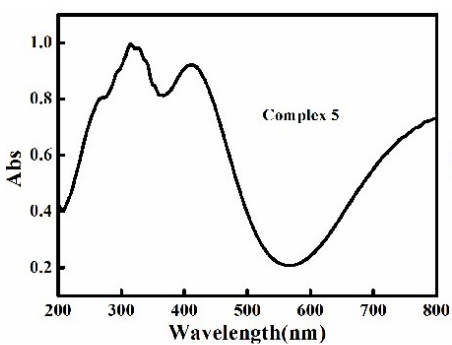

(g)

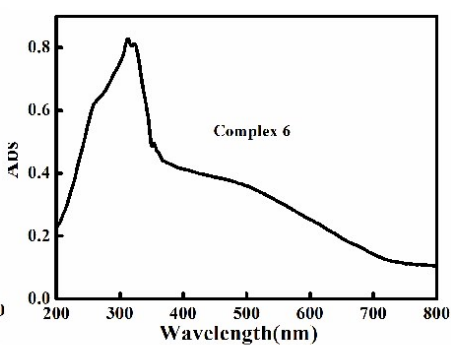

(h)

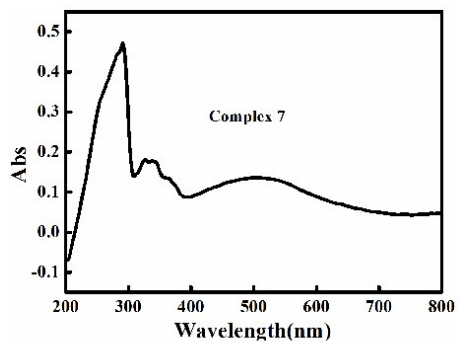

(i)

Figure S2 UV-Vis spectra of ligands and complexes 1-7: (a) Ligand 5-aip; (b) Ligand 4,4'-bipy; (c) Complex 1; (d) Complex 2; (e) Complex 3; (f) Complex 4; (g) Complex 5; (h) Complex 6; (i) Complex 7

Table S5 UV-Vis spectra (nm) of ligand 5-aip, 4,4'-bipy and complexes 1-7

|           | LLCT        |           | LMCT | MMCT |
|-----------|-------------|-----------|------|------|
|           | $\pi-\pi^*$ | $n-\pi^*$ |      |      |
| 5-aip     | 217         | 298       | -    | -    |
| 4,4'-bipy | 215         | 290       | -    | -    |
| <b>1</b>  | 265         | 289       | -    | -    |
| <b>2</b>  | 265         | 314       | 412  | -    |
| <b>3</b>  | 263         | 323       | 398  | 659  |
| <b>4</b>  | 265         | 317       | 383  | 592  |
| <b>5</b>  | 208         | 318       | 331  | 549  |
| <b>6</b>  | 257         | 312       | 351  | -    |
| <b>7</b>  | 216         | 289       | 367  | 503  |

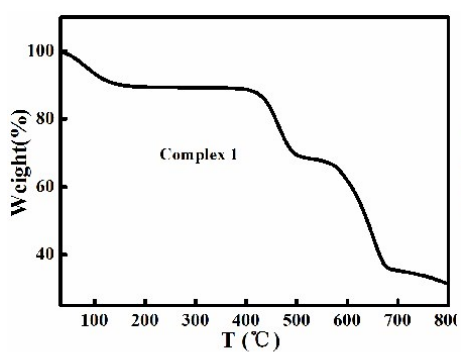

(a)

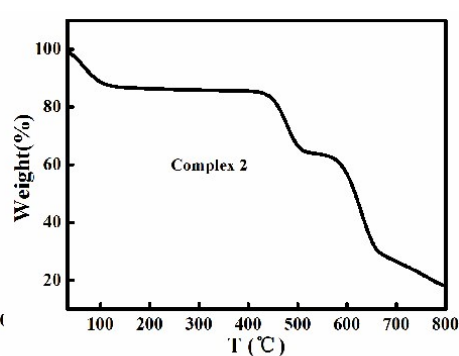

(b)

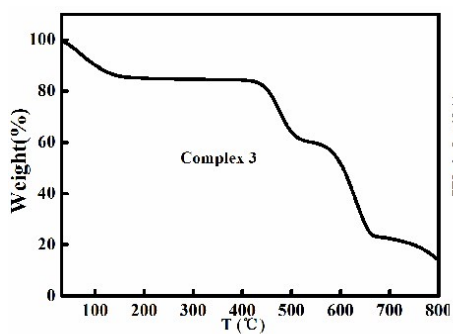

(c)

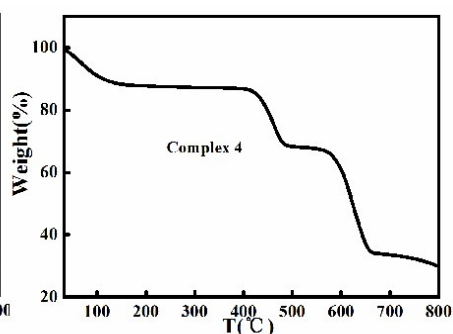

(d)

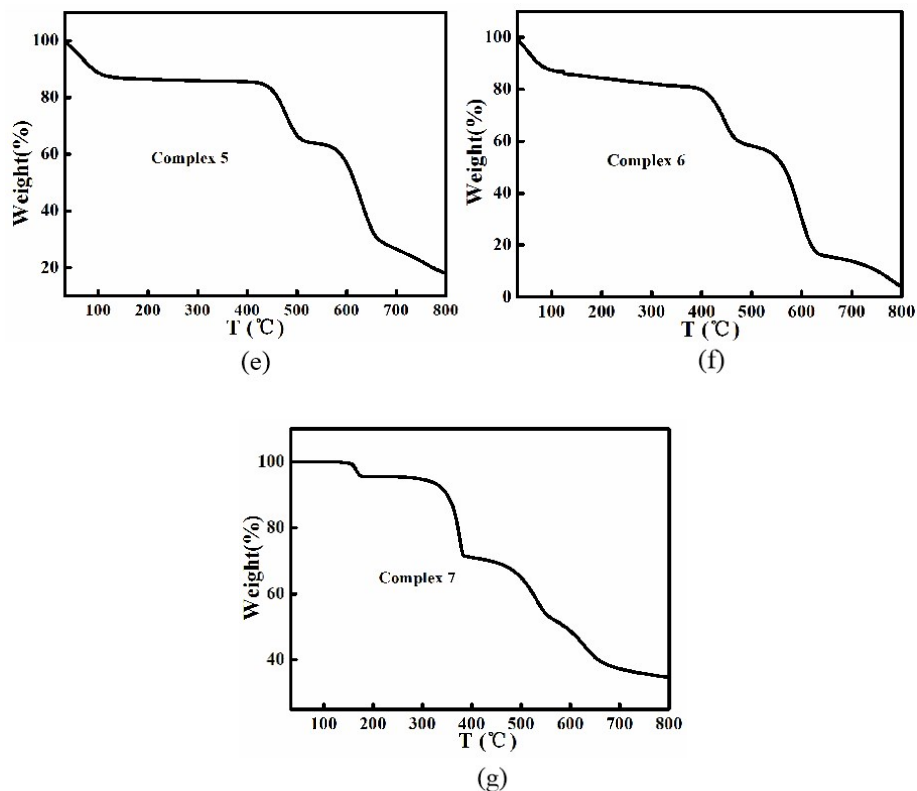

Figure S3 TG curves of complexes 1–7 (a) Complex 1; (b) Complex 2; (c) Complex 3; (d) Complex 4; (e) Complex 5; (f) Complex 6; (g) Complex 7

Table S6 TG analysis data of complexes 1-6

| complexes        |            | 1       | 2       | 3       | 4       | 5       | 6       |
|------------------|------------|---------|---------|---------|---------|---------|---------|
| The first stage  | T(°C)      | 30-373  | 30-356  | 30-380  | 30-388  | 30-344  | 30-180  |
|                  | Cal. value | 10.1%   | 10.1%   | 10.2%   | 8.3%    | 10.1%   | 8.2%    |
|                  | Mea. value | 10.08%  | 10.08%  | 11.5%   | 9.6%    | 9.5%    | 9.7%    |
| The second stage | T(°C)      | 373-518 | 356-520 | 380-525 | 388-491 | 344-530 | 180-478 |
|                  | Cal. value | 21.7%   | 21.5%   | 22.2%   | 17.9%   | 22.2%   | 17.8%   |
|                  | Mea. value | 20.5%   | 21.9%   | 23.9%   | 18.2%   | 21.7%   | 18.7%   |
| The third stage  | T(°C)      | 518-800 | 520-800 | 525-800 | 497-800 | 530-800 | 478-800 |
|                  | Cal. value | 37.02%  | 38.2%   | 47.3%   | 38.1%   | 44.3%   | 53.6%   |
|                  | Mea. value | 37.88%  | 37.02%  | 46.01%  | 37.6%   | 45.1%   | 52.41%  |

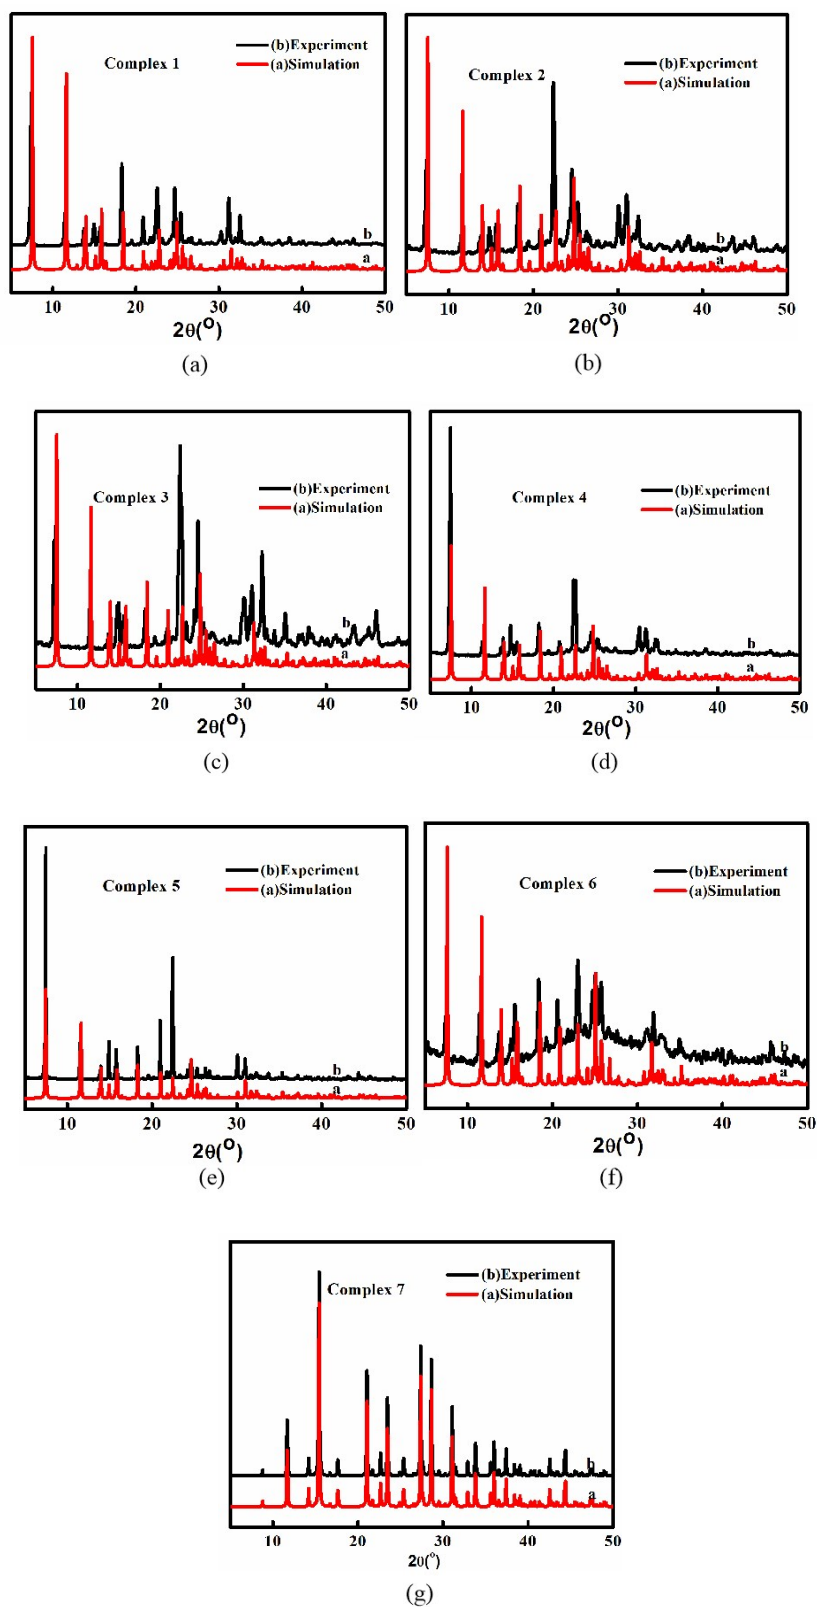

Figure S4 PXRD spectra of complexes 1-7: (a) Complex 1; (b) Complex 2; (c) Complex 3; (d) Complex 4; (e) Complex 5; (f) Complex 6; (g) Complex 7



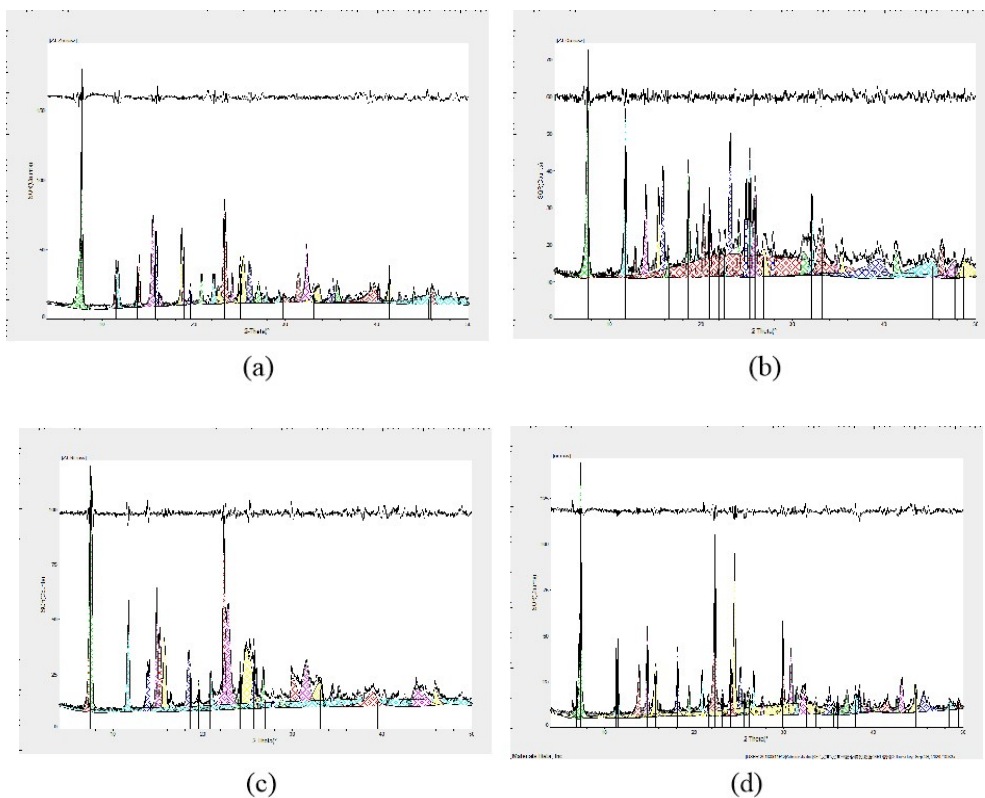

Figure S5 The crystallinity rate of (a) complex 1 (b) complex 2 (c) complex 3 (d) complex 4

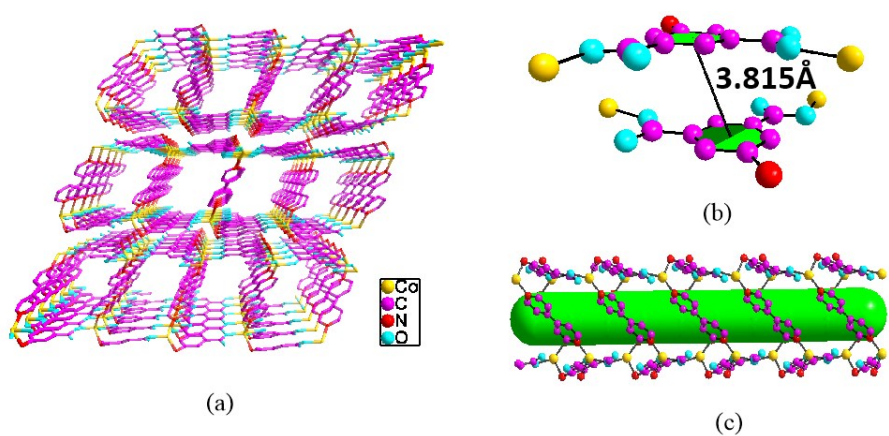

Figure S6 Complex 1: (a) 3D network structure; (b)  $\pi$ - $\pi$  stacking interaction; (c) pore.

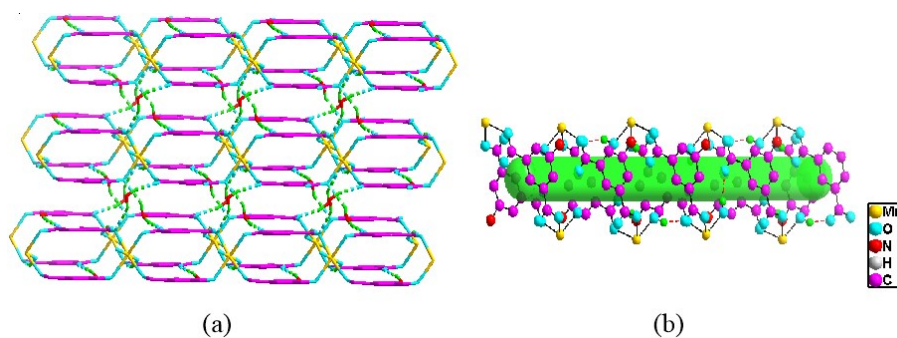

Figure S7 Complex 7: (a) 3D network structure; (b) pore.

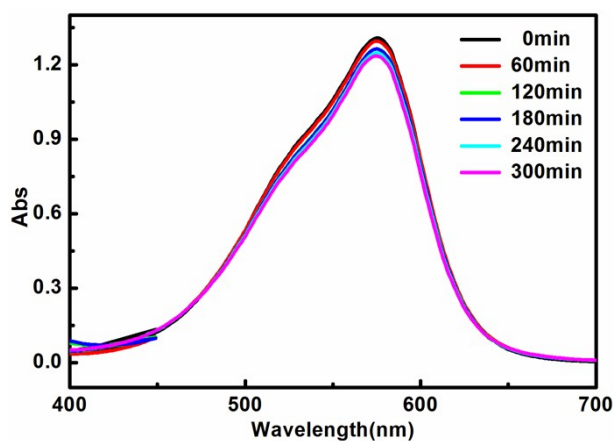

Figure S8 Photocatalytic degradation of CV (10 mg/L) with H<sub>2</sub>O<sub>2</sub> only

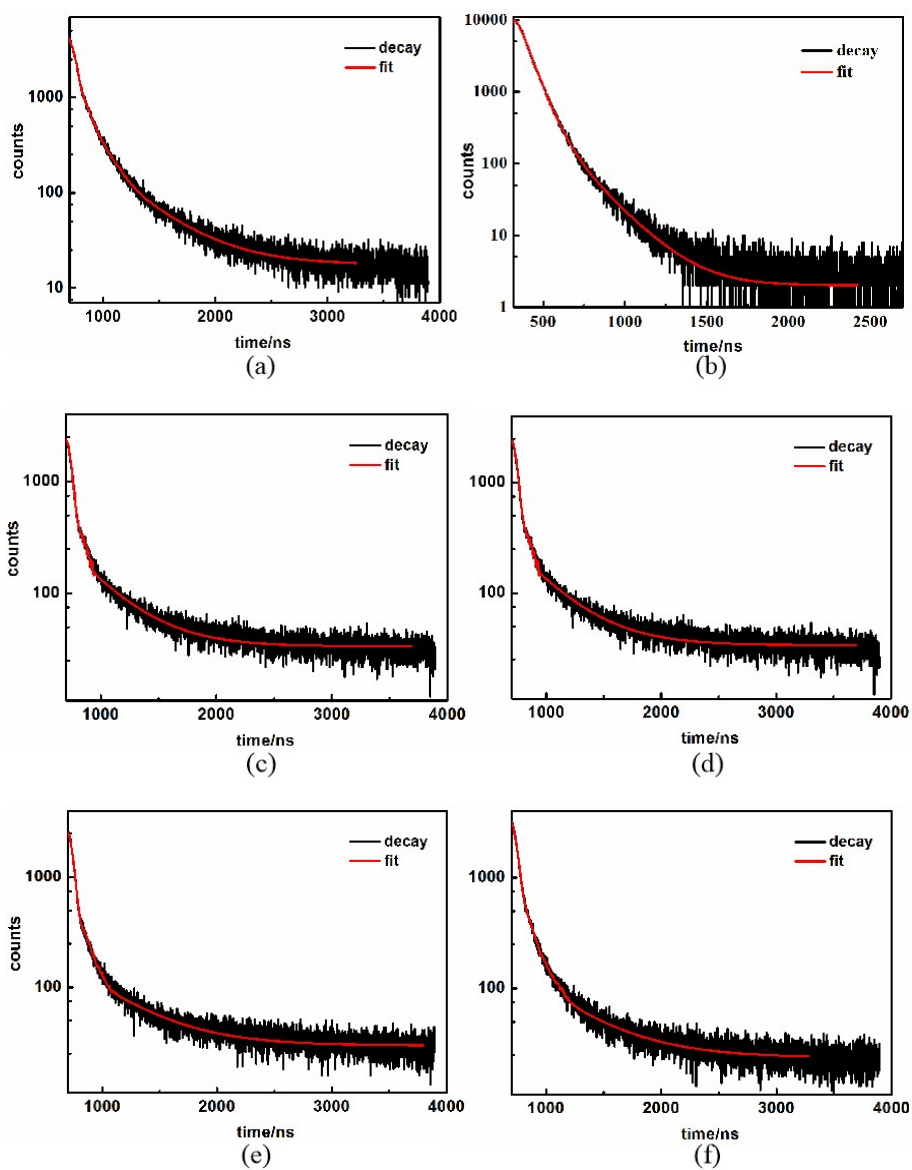

Figure S9 Lifetime of samples (a) 5-aip; (b) 4,4'-bipy ; (c) Complex 1;(d) Complex 2; (e) Complex 3; (f) Complex 4;

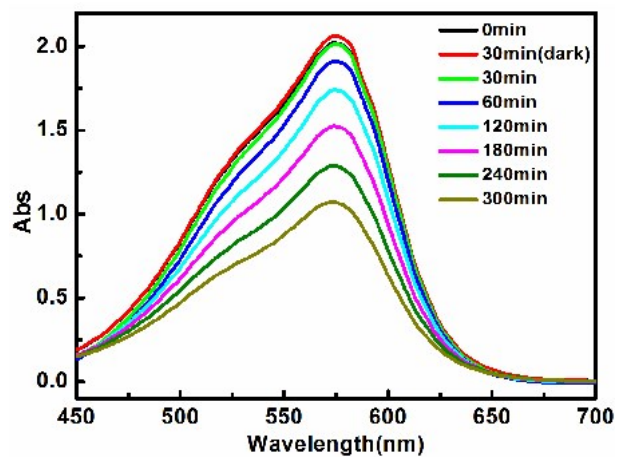

Figure S10 Photocatalytic degradation of CV with 5-aip

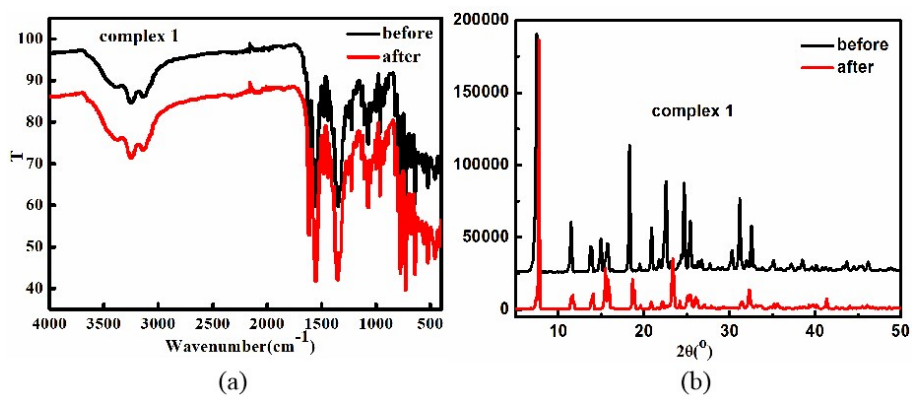

Figure S11 (a) The IR spectra before and after photocatalytic degradation, (b) The PXRD spectra before and after photocatalytic degradation
